# Supplementary material for: First-principles modeling of the infrared spectrum of antigorite
Source: Copernicus journal article supplement (doi:10.5194/ejm-33-389-2021), 2021-07-19
Supplement: Supplementary file 1 [file ejm-33-389-2021-supplement.zip]

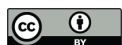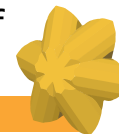

## *Supplement of*

# **First-principles modeling of the infrared spectrum of antigorite**

**Etienne Balan et al.**

*Correspondence to:* Etienne Balan ([etienne.balan@sorbonne-universite.fr](mailto:etienne.balan@sorbonne-universite.fr))

- [ejm-33-389-2021-supplement-title-page.pdf](#)
- [supplement\\_antigorite](#)
  - [.DS\\_Store](#)
  - [Supplementary Information.pdf](#)
  - [antigorite\\_Vesta\\_06\\_2021](#)
    - \* [mode\\_100\\_208.3\\_cm-1.vesta](#)
    - \* [mode\\_101\\_208.7\\_cm-1.vesta](#)
    - \* [mode\\_102\\_209.3\\_cm-1.vesta](#)
    - \* [mode\\_103\\_210.0\\_cm-1.vesta](#)
    - \* [mode\\_104\\_211.4\\_cm-1.vesta](#)
    - \* [mode\\_105\\_211.4\\_cm-1.vesta](#)
    - \* [mode\\_106\\_212.3\\_cm-1.vesta](#)
    - \* [mode\\_107\\_213.6\\_cm-1.vesta](#)
    - \* [mode\\_108\\_214.1\\_cm-1.vesta](#)
    - \* [mode\\_109\\_215.0\\_cm-1.vesta](#)
    - \* [mode\\_10\\_86.0\\_cm-1.vesta](#)
    - \* [mode\\_110\\_215.3\\_cm-1.vesta](#)
    - \* [mode\\_111\\_216.2\\_cm-1.vesta](#)
    - \* [mode\\_112\\_216.4\\_cm-1.vesta](#)
    - \* [mode\\_113\\_217.7\\_cm-1.vesta](#)
    - \* [mode\\_114\\_217.9\\_cm-1.vesta](#)
    - \* [mode\\_115\\_218.2\\_cm-1.vesta](#)
    - \* [mode\\_116\\_220.4\\_cm-1.vesta](#)
    - \* [mode\\_117\\_220.8\\_cm-1.vesta](#)
    - \* [mode\\_118\\_222.0\\_cm-1.vesta](#)
    - \* [mode\\_119\\_222.4\\_cm-1.vesta](#)
    - \* [mode\\_11\\_92.7\\_cm-1.vesta](#)
    - \* [mode\\_120\\_223.9\\_cm-1.vesta](#)

- \* mode\_121\_224.5\_cm-1.vesta
- \* mode\_122\_225.2\_cm-1.vesta
- \* mode\_123\_226.0\_cm-1.vesta
- \* mode\_124\_226.4\_cm-1.vesta
- \* mode\_125\_226.8\_cm-1.vesta
- \* mode\_126\_227.4\_cm-1.vesta
- \* mode\_127\_228.0\_cm-1.vesta
- \* mode\_128\_229.0\_cm-1.vesta
- \* mode\_129\_229.5\_cm-1.vesta
- \* mode\_12\_94.2\_cm-1.vesta
- \* mode\_130\_232.0\_cm-1.vesta
- \* mode\_131\_232.8\_cm-1.vesta
- \* mode\_132\_233.0\_cm-1.vesta
- \* mode\_133\_233.2\_cm-1.vesta
- \* mode\_134\_234.9\_cm-1.vesta
- \* mode\_135\_234.9\_cm-1.vesta
- \* mode\_136\_236.8\_cm-1.vesta
- \* mode\_137\_237.2\_cm-1.vesta
- \* mode\_138\_237.9\_cm-1.vesta
- \* mode\_139\_238.1\_cm-1.vesta
- \* mode\_13\_96.8\_cm-1.vesta
- \* mode\_140\_239.0\_cm-1.vesta
- \* mode\_141\_239.2\_cm-1.vesta
- \* mode\_142\_240.4\_cm-1.vesta
- \* mode\_143\_241.0\_cm-1.vesta
- \* mode\_144\_241.4\_cm-1.vesta
- \* mode\_145\_241.5\_cm-1.vesta
- \* mode\_146\_243.4\_cm-1.vesta
- \* mode\_147\_244.0\_cm-1.vesta
- \* mode\_148\_244.2\_cm-1.vesta
- \* mode\_149\_245.6\_cm-1.vesta
- \* mode\_14\_99.5\_cm-1.vesta
- \* mode\_150\_245.7\_cm-1.vesta
- \* mode\_151\_247.2\_cm-1.vesta
- \* mode\_152\_248.9\_cm-1.vesta
- \* mode\_153\_249.1\_cm-1.vesta
- \* mode\_154\_249.9\_cm-1.vesta
- \* mode\_155\_250.1\_cm-1.vesta
- \* mode\_156\_250.9\_cm-1.vesta
- \* mode\_157\_251.7\_cm-1.vesta
- \* mode\_158\_252.4\_cm-1.vesta
- \* mode\_159\_253.8\_cm-1.vesta
- \* mode\_15\_101.9\_cm-1.vesta
- \* mode\_160\_255.2\_cm-1.vesta
- \* mode\_161\_255.4\_cm-1.vesta
- \* mode\_162\_257.1\_cm-1.vesta
- \* mode\_163\_258.4\_cm-1.vesta

- \* mode\_164\_258.6\_cm-1.vesta
- \* mode\_165\_260.4\_cm-1.vesta
- \* mode\_166\_261.3\_cm-1.vesta
- \* mode\_167\_261.7\_cm-1.vesta
- \* mode\_168\_262.3\_cm-1.vesta
- \* mode\_169\_264.2\_cm-1.vesta
- \* mode\_16\_110.5\_cm-1.vesta
- \* mode\_170\_264.9\_cm-1.vesta
- \* mode\_171\_266.5\_cm-1.vesta
- \* mode\_172\_266.7\_cm-1.vesta
- \* mode\_173\_266.7\_cm-1.vesta
- \* mode\_174\_267.7\_cm-1.vesta
- \* mode\_175\_268.8\_cm-1.vesta
- \* mode\_176\_269.6\_cm-1.vesta
- \* mode\_177\_270.1\_cm-1.vesta
- \* mode\_178\_271.7\_cm-1.vesta
- \* mode\_179\_272.1\_cm-1.vesta
- \* mode\_17\_118.6\_cm-1.vesta
- \* mode\_180\_272.2\_cm-1.vesta
- \* mode\_181\_273.2\_cm-1.vesta
- \* mode\_182\_274.2\_cm-1.vesta
- \* mode\_183\_274.2\_cm-1.vesta
- \* mode\_184\_275.2\_cm-1.vesta
- \* mode\_185\_276.2\_cm-1.vesta
- \* mode\_186\_277.9\_cm-1.vesta
- \* mode\_187\_278.0\_cm-1.vesta
- \* mode\_188\_278.3\_cm-1.vesta
- \* mode\_189\_279.6\_cm-1.vesta
- \* mode\_18\_119.1\_cm-1.vesta
- \* mode\_190\_279.9\_cm-1.vesta
- \* mode\_191\_281.7\_cm-1.vesta
- \* mode\_192\_282.7\_cm-1.vesta
- \* mode\_193\_283.6\_cm-1.vesta
- \* mode\_194\_283.7\_cm-1.vesta
- \* mode\_195\_284.5\_cm-1.vesta
- \* mode\_196\_284.9\_cm-1.vesta
- \* mode\_197\_285.9\_cm-1.vesta
- \* mode\_198\_286.9\_cm-1.vesta
- \* mode\_199\_287.4\_cm-1.vesta
- \* mode\_19\_121.0\_cm-1.vesta
- \* mode\_1\_27.7\_cm-1.vesta
- \* mode\_200\_287.7\_cm-1.vesta
- \* mode\_201\_288.1\_cm-1.vesta
- \* mode\_202\_290.0\_cm-1.vesta
- \* mode\_203\_292.6\_cm-1.vesta
- \* mode\_204\_294.7\_cm-1.vesta
- \* mode\_205\_294.8\_cm-1.vesta

- \* mode\_206\_295.5\_cm-1.vesta
- \* mode\_207\_295.5\_cm-1.vesta
- \* mode\_208\_296.8\_cm-1.vesta
- \* mode\_209\_297.5\_cm-1.vesta
- \* mode\_20\_124.6\_cm-1.vesta
- \* mode\_210\_298.8\_cm-1.vesta
- \* mode\_211\_299.7\_cm-1.vesta
- \* mode\_212\_300.1\_cm-1.vesta
- \* mode\_213\_300.9\_cm-1.vesta
- \* mode\_214\_301.1\_cm-1.vesta
- \* mode\_215\_301.9\_cm-1.vesta
- \* mode\_216\_302.1\_cm-1.vesta
- \* mode\_217\_304.3\_cm-1.vesta
- \* mode\_218\_304.3\_cm-1.vesta
- \* mode\_219\_304.5\_cm-1.vesta
- \* mode\_21\_125.6\_cm-1.vesta
- \* mode\_220\_306.2\_cm-1.vesta
- \* mode\_221\_307.2\_cm-1.vesta
- \* mode\_222\_307.4\_cm-1.vesta
- \* mode\_223\_307.9\_cm-1.vesta
- \* mode\_224\_308.5\_cm-1.vesta
- \* mode\_225\_309.0\_cm-1.vesta
- \* mode\_226\_309.9\_cm-1.vesta
- \* mode\_227\_311.0\_cm-1.vesta
- \* mode\_228\_312.4\_cm-1.vesta
- \* mode\_229\_312.5\_cm-1.vesta
- \* mode\_22\_127.2\_cm-1.vesta
- \* mode\_230\_313.6\_cm-1.vesta
- \* mode\_231\_313.6\_cm-1.vesta
- \* mode\_232\_313.8\_cm-1.vesta
- \* mode\_233\_314.6\_cm-1.vesta
- \* mode\_234\_315.3\_cm-1.vesta
- \* mode\_235\_315.7\_cm-1.vesta
- \* mode\_236\_315.8\_cm-1.vesta
- \* mode\_237\_316.4\_cm-1.vesta
- \* mode\_238\_316.5\_cm-1.vesta
- \* mode\_239\_317.5\_cm-1.vesta
- \* mode\_23\_127.9\_cm-1.vesta
- \* mode\_240\_318.0\_cm-1.vesta
- \* mode\_241\_319.1\_cm-1.vesta
- \* mode\_242\_319.2\_cm-1.vesta
- \* mode\_243\_321.4\_cm-1.vesta
- \* mode\_244\_321.6\_cm-1.vesta
- \* mode\_245\_321.6\_cm-1.vesta
- \* mode\_246\_323.3\_cm-1.vesta
- \* mode\_247\_323.4\_cm-1.vesta
- \* mode\_248\_323.9\_cm-1.vesta

- \* mode\_249\_324.4\_cm-1.vesta
- \* mode\_24\_129.9\_cm-1.vesta
- \* mode\_250\_325.5\_cm-1.vesta
- \* mode\_251\_325.5\_cm-1.vesta
- \* mode\_252\_326.1\_cm-1.vesta
- \* mode\_253\_327.2\_cm-1.vesta
- \* mode\_254\_327.5\_cm-1.vesta
- \* mode\_255\_327.9\_cm-1.vesta
- \* mode\_256\_329.4\_cm-1.vesta
- \* mode\_257\_329.8\_cm-1.vesta
- \* mode\_258\_330.4\_cm-1.vesta
- \* mode\_259\_331.1\_cm-1.vesta
- \* mode\_25\_133.1\_cm-1.vesta
- \* mode\_260\_331.5\_cm-1.vesta
- \* mode\_261\_332.3\_cm-1.vesta
- \* mode\_262\_332.6\_cm-1.vesta
- \* mode\_263\_333.1\_cm-1.vesta
- \* mode\_264\_333.3\_cm-1.vesta
- \* mode\_265\_333.6\_cm-1.vesta
- \* mode\_266\_334.8\_cm-1.vesta
- \* mode\_267\_335.6\_cm-1.vesta
- \* mode\_268\_335.6\_cm-1.vesta
- \* mode\_269\_337.1\_cm-1.vesta
- \* mode\_26\_137.3\_cm-1.vesta
- \* mode\_270\_337.2\_cm-1.vesta
- \* mode\_271\_338.8\_cm-1.vesta
- \* mode\_272\_338.9\_cm-1.vesta
- \* mode\_273\_340.1\_cm-1.vesta
- \* mode\_274\_340.7\_cm-1.vesta
- \* mode\_275\_342.3\_cm-1.vesta
- \* mode\_276\_342.7\_cm-1.vesta
- \* mode\_277\_342.9\_cm-1.vesta
- \* mode\_278\_344.2\_cm-1.vesta
- \* mode\_279\_345.4\_cm-1.vesta
- \* mode\_27\_137.8\_cm-1.vesta
- \* mode\_280\_346.2\_cm-1.vesta
- \* mode\_281\_346.9\_cm-1.vesta
- \* mode\_282\_348.9\_cm-1.vesta
- \* mode\_283\_349.9\_cm-1.vesta
- \* mode\_284\_350.6\_cm-1.vesta
- \* mode\_285\_351.3\_cm-1.vesta
- \* mode\_286\_352.4\_cm-1.vesta
- \* mode\_287\_354.0\_cm-1.vesta
- \* mode\_288\_354.2\_cm-1.vesta
- \* mode\_289\_354.6\_cm-1.vesta
- \* mode\_28\_139.5\_cm-1.vesta
- \* mode\_290\_355.0\_cm-1.vesta

- \* mode\_291\_356.7\_cm-1.vesta
- \* mode\_292\_357.5\_cm-1.vesta
- \* mode\_293\_358.3\_cm-1.vesta
- \* mode\_294\_359.0\_cm-1.vesta
- \* mode\_295\_359.7\_cm-1.vesta
- \* mode\_296\_360.7\_cm-1.vesta
- \* mode\_297\_360.9\_cm-1.vesta
- \* mode\_298\_361.4\_cm-1.vesta
- \* mode\_299\_362.8\_cm-1.vesta
- \* mode\_29\_139.6\_cm-1.vesta
- \* mode\_2\_41.2\_cm-1.vesta
- \* mode\_300\_363.4\_cm-1.vesta
- \* mode\_301\_364.0\_cm-1.vesta
- \* mode\_302\_364.2\_cm-1.vesta
- \* mode\_303\_364.3\_cm-1.vesta
- \* mode\_304\_365.5\_cm-1.vesta
- \* mode\_305\_365.6\_cm-1.vesta
- \* mode\_306\_366.1\_cm-1.vesta
- \* mode\_307\_367.4\_cm-1.vesta
- \* mode\_308\_367.7\_cm-1.vesta
- \* mode\_309\_367.9\_cm-1.vesta
- \* mode\_30\_143.4\_cm-1.vesta
- \* mode\_310\_368.0\_cm-1.vesta
- \* mode\_311\_369.3\_cm-1.vesta
- \* mode\_312\_369.8\_cm-1.vesta
- \* mode\_313\_370.6\_cm-1.vesta
- \* mode\_314\_371.1\_cm-1.vesta
- \* mode\_315\_371.7\_cm-1.vesta
- \* mode\_316\_371.7\_cm-1.vesta
- \* mode\_317\_371.9\_cm-1.vesta
- \* mode\_318\_372.5\_cm-1.vesta
- \* mode\_319\_372.6\_cm-1.vesta
- \* mode\_31\_143.8\_cm-1.vesta
- \* mode\_320\_373.4\_cm-1.vesta
- \* mode\_321\_374.4\_cm-1.vesta
- \* mode\_322\_374.8\_cm-1.vesta
- \* mode\_323\_375.6\_cm-1.vesta
- \* mode\_324\_376.3\_cm-1.vesta
- \* mode\_325\_376.5\_cm-1.vesta
- \* mode\_326\_376.6\_cm-1.vesta
- \* mode\_327\_376.7\_cm-1.vesta
- \* mode\_328\_377.0\_cm-1.vesta
- \* mode\_329\_377.2\_cm-1.vesta
- \* mode\_32\_145.2\_cm-1.vesta
- \* mode\_330\_377.9\_cm-1.vesta
- \* mode\_331\_378.6\_cm-1.vesta
- \* mode\_332\_378.6\_cm-1.vesta

- \* mode\_333\_379.2\_cm-1.vesta
- \* mode\_334\_380.2\_cm-1.vesta
- \* mode\_335\_380.6\_cm-1.vesta
- \* mode\_336\_381.4\_cm-1.vesta
- \* mode\_337\_381.4\_cm-1.vesta
- \* mode\_338\_381.9\_cm-1.vesta
- \* mode\_339\_382.4\_cm-1.vesta
- \* mode\_33\_146.5\_cm-1.vesta
- \* mode\_340\_383.2\_cm-1.vesta
- \* mode\_341\_383.9\_cm-1.vesta
- \* mode\_342\_384.3\_cm-1.vesta
- \* mode\_343\_384.7\_cm-1.vesta
- \* mode\_344\_385.4\_cm-1.vesta
- \* mode\_345\_385.8\_cm-1.vesta
- \* mode\_346\_385.8\_cm-1.vesta
- \* mode\_347\_387.3\_cm-1.vesta
- \* mode\_348\_387.5\_cm-1.vesta
- \* mode\_349\_387.7\_cm-1.vesta
- \* mode\_34\_147.5\_cm-1.vesta
- \* mode\_350\_387.9\_cm-1.vesta
- \* mode\_351\_388.3\_cm-1.vesta
- \* mode\_352\_390.3\_cm-1.vesta
- \* mode\_353\_390.4\_cm-1.vesta
- \* mode\_354\_391.6\_cm-1.vesta
- \* mode\_355\_392.0\_cm-1.vesta
- \* mode\_356\_392.5\_cm-1.vesta
- \* mode\_357\_393.6\_cm-1.vesta
- \* mode\_358\_394.2\_cm-1.vesta
- \* mode\_359\_394.6\_cm-1.vesta
- \* mode\_35\_148.7\_cm-1.vesta
- \* mode\_360\_394.8\_cm-1.vesta
- \* mode\_361\_395.8\_cm-1.vesta
- \* mode\_362\_396.0\_cm-1.vesta
- \* mode\_363\_396.6\_cm-1.vesta
- \* mode\_364\_397.0\_cm-1.vesta
- \* mode\_365\_397.3\_cm-1.vesta
- \* mode\_366\_398.0\_cm-1.vesta
- \* mode\_367\_398.1\_cm-1.vesta
- \* mode\_368\_399.8\_cm-1.vesta
- \* mode\_369\_399.9\_cm-1.vesta
- \* mode\_36\_149.6\_cm-1.vesta
- \* mode\_370\_400.2\_cm-1.vesta
- \* mode\_371\_401.0\_cm-1.vesta
- \* mode\_372\_401.6\_cm-1.vesta
- \* mode\_373\_402.7\_cm-1.vesta
- \* mode\_374\_403.7\_cm-1.vesta
- \* mode\_375\_403.7\_cm-1.vesta

- \* mode\_376\_404.0\_cm-1.vesta
- \* mode\_377\_405.0\_cm-1.vesta
- \* mode\_378\_405.6\_cm-1.vesta
- \* mode\_379\_405.6\_cm-1.vesta
- \* mode\_37\_150.2\_cm-1.vesta
- \* mode\_380\_406.2\_cm-1.vesta
- \* mode\_381\_407.1\_cm-1.vesta
- \* mode\_382\_407.2\_cm-1.vesta
- \* mode\_383\_407.8\_cm-1.vesta
- \* mode\_384\_408.1\_cm-1.vesta
- \* mode\_385\_409.4\_cm-1.vesta
- \* mode\_386\_409.5\_cm-1.vesta
- \* mode\_387\_410.3\_cm-1.vesta
- \* mode\_388\_410.4\_cm-1.vesta
- \* mode\_389\_412.2\_cm-1.vesta
- \* mode\_38\_151.9\_cm-1.vesta
- \* mode\_390\_412.9\_cm-1.vesta
- \* mode\_391\_413.4\_cm-1.vesta
- \* mode\_392\_413.6\_cm-1.vesta
- \* mode\_393\_414.4\_cm-1.vesta
- \* mode\_394\_414.6\_cm-1.vesta
- \* mode\_395\_415.0\_cm-1.vesta
- \* mode\_396\_415.3\_cm-1.vesta
- \* mode\_397\_416.4\_cm-1.vesta
- \* mode\_398\_416.9\_cm-1.vesta
- \* mode\_399\_417.8\_cm-1.vesta
- \* mode\_39\_152.8\_cm-1.vesta
- \* mode\_3\_44.3\_cm-1.vesta
- \* mode\_400\_418.4\_cm-1.vesta
- \* mode\_401\_418.4\_cm-1.vesta
- \* mode\_402\_418.7\_cm-1.vesta
- \* mode\_403\_419.1\_cm-1.vesta
- \* mode\_404\_419.4\_cm-1.vesta
- \* mode\_405\_419.9\_cm-1.vesta
- \* mode\_406\_420.0\_cm-1.vesta
- \* mode\_407\_420.1\_cm-1.vesta
- \* mode\_408\_421.1\_cm-1.vesta
- \* mode\_409\_421.5\_cm-1.vesta
- \* mode\_40\_153.5\_cm-1.vesta
- \* mode\_410\_422.2\_cm-1.vesta
- \* mode\_411\_422.4\_cm-1.vesta
- \* mode\_412\_422.7\_cm-1.vesta
- \* mode\_413\_423.0\_cm-1.vesta
- \* mode\_414\_423.5\_cm-1.vesta
- \* mode\_415\_423.7\_cm-1.vesta
- \* mode\_416\_424.2\_cm-1.vesta
- \* mode\_417\_424.9\_cm-1.vesta



- \* mode\_418\_425.0\_cm-1.vesta
- \* mode\_419\_425.0\_cm-1.vesta
- \* mode\_41\_153.8\_cm-1.vesta
- \* mode\_420\_425.9\_cm-1.vesta
- \* mode\_421\_426.0\_cm-1.vesta
- \* mode\_422\_426.6\_cm-1.vesta
- \* mode\_423\_427.2\_cm-1.vesta
- \* mode\_424\_427.8\_cm-1.vesta
- \* mode\_425\_427.9\_cm-1.vesta
- \* mode\_426\_428.8\_cm-1.vesta
- \* mode\_427\_429.5\_cm-1.vesta
- \* mode\_428\_429.7\_cm-1.vesta
- \* mode\_429\_429.8\_cm-1.vesta
- \* mode\_42\_154.1\_cm-1.vesta
- \* mode\_430\_430.7\_cm-1.vesta
- \* mode\_431\_431.5\_cm-1.vesta
- \* mode\_432\_432.5\_cm-1.vesta
- \* mode\_433\_433.0\_cm-1.vesta
- \* mode\_434\_434.7\_cm-1.vesta
- \* mode\_435\_435.3\_cm-1.vesta
- \* mode\_436\_435.8\_cm-1.vesta
- \* mode\_437\_436.1\_cm-1.vesta
- \* mode\_438\_437.2\_cm-1.vesta
- \* mode\_439\_437.3\_cm-1.vesta
- \* mode\_43\_155.1\_cm-1.vesta
- \* mode\_440\_438.6\_cm-1.vesta
- \* mode\_441\_438.6\_cm-1.vesta
- \* mode\_442\_439.2\_cm-1.vesta
- \* mode\_443\_440.0\_cm-1.vesta
- \* mode\_444\_440.4\_cm-1.vesta
- \* mode\_445\_441.2\_cm-1.vesta
- \* mode\_446\_441.8\_cm-1.vesta
- \* mode\_447\_442.7\_cm-1.vesta
- \* mode\_448\_443.9\_cm-1.vesta
- \* mode\_449\_444.2\_cm-1.vesta
- \* mode\_44\_158.3\_cm-1.vesta
- \* mode\_450\_445.4\_cm-1.vesta
- \* mode\_451\_445.6\_cm-1.vesta
- \* mode\_452\_446.2\_cm-1.vesta
- \* mode\_453\_447.6\_cm-1.vesta
- \* mode\_454\_448.7\_cm-1.vesta
- \* mode\_455\_449.6\_cm-1.vesta
- \* mode\_456\_450.8\_cm-1.vesta
- \* mode\_457\_451.9\_cm-1.vesta
- \* mode\_458\_453.9\_cm-1.vesta
- \* mode\_459\_454.3\_cm-1.vesta
- \* mode\_45\_158.7\_cm-1.vesta

- \* mode\_460\_454.3\_cm-1.vesta
- \* mode\_461\_455.5\_cm-1.vesta
- \* mode\_462\_456.4\_cm-1.vesta
- \* mode\_463\_456.7\_cm-1.vesta
- \* mode\_464\_458.0\_cm-1.vesta
- \* mode\_465\_459.3\_cm-1.vesta
- \* mode\_466\_460.3\_cm-1.vesta
- \* mode\_467\_461.4\_cm-1.vesta
- \* mode\_468\_461.9\_cm-1.vesta
- \* mode\_469\_463.5\_cm-1.vesta
- \* mode\_46\_160.4\_cm-1.vesta
- \* mode\_470\_463.9\_cm-1.vesta
- \* mode\_471\_464.3\_cm-1.vesta
- \* mode\_472\_466.2\_cm-1.vesta
- \* mode\_473\_467.6\_cm-1.vesta
- \* mode\_474\_467.8\_cm-1.vesta
- \* mode\_475\_468.5\_cm-1.vesta
- \* mode\_476\_469.1\_cm-1.vesta
- \* mode\_477\_470.5\_cm-1.vesta
- \* mode\_478\_471.3\_cm-1.vesta
- \* mode\_479\_471.6\_cm-1.vesta
- \* mode\_47\_161.7\_cm-1.vesta
- \* mode\_480\_471.8\_cm-1.vesta
- \* mode\_481\_471.9\_cm-1.vesta
- \* mode\_482\_472.6\_cm-1.vesta
- \* mode\_483\_473.8\_cm-1.vesta
- \* mode\_484\_474.6\_cm-1.vesta
- \* mode\_485\_474.8\_cm-1.vesta
- \* mode\_486\_475.1\_cm-1.vesta
- \* mode\_487\_475.3\_cm-1.vesta
- \* mode\_488\_475.4\_cm-1.vesta
- \* mode\_489\_477.0\_cm-1.vesta
- \* mode\_48\_162.3\_cm-1.vesta
- \* mode\_490\_477.6\_cm-1.vesta
- \* mode\_491\_478.2\_cm-1.vesta
- \* mode\_492\_479.2\_cm-1.vesta
- \* mode\_493\_479.4\_cm-1.vesta
- \* mode\_494\_480.2\_cm-1.vesta
- \* mode\_495\_481.1\_cm-1.vesta
- \* mode\_496\_481.2\_cm-1.vesta
- \* mode\_497\_482.1\_cm-1.vesta
- \* mode\_498\_484.9\_cm-1.vesta
- \* mode\_499\_486.1\_cm-1.vesta
- \* mode\_49\_162.8\_cm-1.vesta
- \* mode\_4\_53.1\_cm-1.vesta
- \* mode\_500\_486.1\_cm-1.vesta
- \* mode\_501\_486.3\_cm-1.vesta

- \* mode\_502\_487.8\_cm-1.vesta
- \* mode\_503\_488.3\_cm-1.vesta
- \* mode\_504\_489.9\_cm-1.vesta
- \* mode\_505\_491.9\_cm-1.vesta
- \* mode\_506\_492.6\_cm-1.vesta
- \* mode\_507\_492.9\_cm-1.vesta
- \* mode\_508\_493.3\_cm-1.vesta
- \* mode\_509\_495.5\_cm-1.vesta
- \* mode\_50\_163.7\_cm-1.vesta
- \* mode\_510\_497.8\_cm-1.vesta
- \* mode\_511\_498.6\_cm-1.vesta
- \* mode\_512\_500.0\_cm-1.vesta
- \* mode\_513\_500.1\_cm-1.vesta
- \* mode\_514\_501.6\_cm-1.vesta
- \* mode\_515\_502.5\_cm-1.vesta
- \* mode\_516\_503.4\_cm-1.vesta
- \* mode\_517\_504.1\_cm-1.vesta
- \* mode\_518\_504.5\_cm-1.vesta
- \* mode\_519\_505.1\_cm-1.vesta
- \* mode\_51\_164.6\_cm-1.vesta
- \* mode\_520\_506.0\_cm-1.vesta
- \* mode\_521\_507.1\_cm-1.vesta
- \* mode\_522\_507.9\_cm-1.vesta
- \* mode\_523\_509.4\_cm-1.vesta
- \* mode\_524\_509.6\_cm-1.vesta
- \* mode\_525\_510.1\_cm-1.vesta
- \* mode\_526\_512.1\_cm-1.vesta
- \* mode\_527\_513.0\_cm-1.vesta
- \* mode\_528\_515.6\_cm-1.vesta
- \* mode\_529\_516.8\_cm-1.vesta
- \* mode\_52\_165.7\_cm-1.vesta
- \* mode\_530\_518.0\_cm-1.vesta
- \* mode\_531\_519.0\_cm-1.vesta
- \* mode\_532\_519.5\_cm-1.vesta
- \* mode\_533\_519.8\_cm-1.vesta
- \* mode\_534\_520.1\_cm-1.vesta
- \* mode\_535\_521.3\_cm-1.vesta
- \* mode\_536\_521.6\_cm-1.vesta
- \* mode\_537\_526.3\_cm-1.vesta
- \* mode\_538\_528.4\_cm-1.vesta
- \* mode\_539\_529.4\_cm-1.vesta
- \* mode\_53\_167.7\_cm-1.vesta
- \* mode\_540\_532.4\_cm-1.vesta
- \* mode\_541\_534.3\_cm-1.vesta
- \* mode\_542\_536.5\_cm-1.vesta
- \* mode\_543\_538.1\_cm-1.vesta
- \* mode\_544\_541.0\_cm-1.vesta

- \* mode\_545\_543.8\_cm-1.vesta
- \* mode\_546\_544.3\_cm-1.vesta
- \* mode\_547\_545.7\_cm-1.vesta
- \* mode\_548\_547.7\_cm-1.vesta
- \* mode\_549\_548.9\_cm-1.vesta
- \* mode\_54\_168.9\_cm-1.vesta
- \* mode\_550\_555.4\_cm-1.vesta
- \* mode\_551\_557.9\_cm-1.vesta
- \* mode\_552\_589.9\_cm-1.vesta
- \* mode\_553\_591.7\_cm-1.vesta
- \* mode\_554\_596.8\_cm-1.vesta
- \* mode\_555\_599.1\_cm-1.vesta
- \* mode\_556\_600.2\_cm-1.vesta
- \* mode\_557\_601.4\_cm-1.vesta
- \* mode\_558\_607.8\_cm-1.vesta
- \* mode\_559\_609.6\_cm-1.vesta
- \* mode\_55\_169.4\_cm-1.vesta
- \* mode\_560\_610.1\_cm-1.vesta
- \* mode\_561\_611.4\_cm-1.vesta
- \* mode\_562\_611.7\_cm-1.vesta
- \* mode\_563\_612.5\_cm-1.vesta
- \* mode\_564\_613.8\_cm-1.vesta
- \* mode\_565\_616.0\_cm-1.vesta
- \* mode\_566\_616.5\_cm-1.vesta
- \* mode\_567\_616.7\_cm-1.vesta
- \* mode\_568\_617.8\_cm-1.vesta
- \* mode\_569\_619.0\_cm-1.vesta
- \* mode\_56\_170.4\_cm-1.vesta
- \* mode\_570\_619.8\_cm-1.vesta
- \* mode\_571\_620.6\_cm-1.vesta
- \* mode\_572\_620.8\_cm-1.vesta
- \* mode\_573\_622.5\_cm-1.vesta
- \* mode\_574\_622.5\_cm-1.vesta
- \* mode\_575\_622.7\_cm-1.vesta
- \* mode\_576\_623.8\_cm-1.vesta
- \* mode\_577\_624.4\_cm-1.vesta
- \* mode\_578\_624.8\_cm-1.vesta
- \* mode\_579\_625.4\_cm-1.vesta
- \* mode\_57\_171.8\_cm-1.vesta
- \* mode\_580\_626.8\_cm-1.vesta
- \* mode\_581\_627.0\_cm-1.vesta
- \* mode\_582\_628.4\_cm-1.vesta
- \* mode\_583\_629.9\_cm-1.vesta
- \* mode\_584\_630.8\_cm-1.vesta
- \* mode\_585\_631.7\_cm-1.vesta
- \* mode\_586\_633.2\_cm-1.vesta
- \* mode\_587\_643.2\_cm-1.vesta

- \* mode\_588\_644.3\_cm-1.vesta
- \* mode\_589\_645.0\_cm-1.vesta
- \* mode\_58\_172.6\_cm-1.vesta
- \* mode\_590\_646.9\_cm-1.vesta
- \* mode\_591\_650.3\_cm-1.vesta
- \* mode\_592\_650.9\_cm-1.vesta
- \* mode\_593\_651.2\_cm-1.vesta
- \* mode\_594\_653.2\_cm-1.vesta
- \* mode\_595\_653.8\_cm-1.vesta
- \* mode\_596\_655.2\_cm-1.vesta
- \* mode\_597\_657.8\_cm-1.vesta
- \* mode\_598\_657.9\_cm-1.vesta
- \* mode\_599\_658.1\_cm-1.vesta
- \* mode\_59\_173.0\_cm-1.vesta
- \* mode\_5\_64.7\_cm-1.vesta
- \* mode\_600\_659.0\_cm-1.vesta
- \* mode\_601\_659.8\_cm-1.vesta
- \* mode\_602\_659.8\_cm-1.vesta
- \* mode\_603\_660.7\_cm-1.vesta
- \* mode\_604\_661.3\_cm-1.vesta
- \* mode\_605\_661.7\_cm-1.vesta
- \* mode\_606\_662.2\_cm-1.vesta
- \* mode\_607\_663.3\_cm-1.vesta
- \* mode\_608\_663.4\_cm-1.vesta
- \* mode\_609\_666.2\_cm-1.vesta
- \* mode\_60\_173.6\_cm-1.vesta
- \* mode\_610\_666.7\_cm-1.vesta
- \* mode\_611\_667.7\_cm-1.vesta
- \* mode\_612\_668.0\_cm-1.vesta
- \* mode\_613\_669.7\_cm-1.vesta
- \* mode\_614\_670.4\_cm-1.vesta
- \* mode\_615\_670.8\_cm-1.vesta
- \* mode\_616\_672.3\_cm-1.vesta
- \* mode\_617\_672.8\_cm-1.vesta
- \* mode\_618\_673.6\_cm-1.vesta
- \* mode\_619\_674.2\_cm-1.vesta
- \* mode\_61\_176.6\_cm-1.vesta
- \* mode\_620\_674.4\_cm-1.vesta
- \* mode\_621\_676.9\_cm-1.vesta
- \* mode\_622\_678.1\_cm-1.vesta
- \* mode\_623\_680.0\_cm-1.vesta
- \* mode\_624\_681.2\_cm-1.vesta
- \* mode\_625\_681.6\_cm-1.vesta
- \* mode\_626\_683.8\_cm-1.vesta
- \* mode\_627\_685.0\_cm-1.vesta
- \* mode\_628\_686.4\_cm-1.vesta
- \* mode\_629\_686.9\_cm-1.vesta

- \* mode\_62\_178.1\_cm-1.vesta
- \* mode\_630\_688.0\_cm-1.vesta
- \* mode\_631\_688.1\_cm-1.vesta
- \* mode\_632\_688.6\_cm-1.vesta
- \* mode\_633\_690.2\_cm-1.vesta
- \* mode\_634\_690.5\_cm-1.vesta
- \* mode\_635\_691.7\_cm-1.vesta
- \* mode\_636\_693.2\_cm-1.vesta
- \* mode\_637\_694.4\_cm-1.vesta
- \* mode\_638\_695.2\_cm-1.vesta
- \* mode\_639\_696.8\_cm-1.vesta
- \* mode\_63\_178.3\_cm-1.vesta
- \* mode\_640\_698.7\_cm-1.vesta
- \* mode\_641\_699.0\_cm-1.vesta
- \* mode\_642\_699.2\_cm-1.vesta
- \* mode\_643\_701.2\_cm-1.vesta
- \* mode\_644\_703.3\_cm-1.vesta
- \* mode\_645\_704.7\_cm-1.vesta
- \* mode\_646\_706.7\_cm-1.vesta
- \* mode\_647\_707.6\_cm-1.vesta
- \* mode\_648\_708.7\_cm-1.vesta
- \* mode\_649\_709.4\_cm-1.vesta
- \* mode\_64\_179.6\_cm-1.vesta
- \* mode\_650\_713.3\_cm-1.vesta
- \* mode\_651\_714.2\_cm-1.vesta
- \* mode\_652\_715.3\_cm-1.vesta
- \* mode\_653\_715.6\_cm-1.vesta
- \* mode\_654\_717.1\_cm-1.vesta
- \* mode\_655\_717.9\_cm-1.vesta
- \* mode\_656\_718.0\_cm-1.vesta
- \* mode\_657\_719.9\_cm-1.vesta
- \* mode\_658\_721.4\_cm-1.vesta
- \* mode\_659\_723.2\_cm-1.vesta
- \* mode\_65\_179.9\_cm-1.vesta
- \* mode\_660\_724.0\_cm-1.vesta
- \* mode\_661\_724.7\_cm-1.vesta
- \* mode\_662\_725.8\_cm-1.vesta
- \* mode\_663\_728.0\_cm-1.vesta
- \* mode\_664\_730.8\_cm-1.vesta
- \* mode\_665\_733.6\_cm-1.vesta
- \* mode\_666\_734.2\_cm-1.vesta
- \* mode\_667\_736.9\_cm-1.vesta
- \* mode\_668\_737.8\_cm-1.vesta
- \* mode\_669\_738.0\_cm-1.vesta
- \* mode\_66\_180.1\_cm-1.vesta
- \* mode\_670\_738.7\_cm-1.vesta
- \* mode\_671\_740.2\_cm-1.vesta

- \* mode\_672\_740.9\_cm-1.vesta
- \* mode\_673\_741.5\_cm-1.vesta
- \* mode\_674\_743.1\_cm-1.vesta
- \* mode\_675\_744.3\_cm-1.vesta
- \* mode\_676\_744.7\_cm-1.vesta
- \* mode\_677\_745.4\_cm-1.vesta
- \* mode\_678\_746.2\_cm-1.vesta
- \* mode\_679\_746.7\_cm-1.vesta
- \* mode\_67\_181.1\_cm-1.vesta
- \* mode\_680\_746.9\_cm-1.vesta
- \* mode\_681\_755.0\_cm-1.vesta
- \* mode\_682\_756.4\_cm-1.vesta
- \* mode\_683\_758.9\_cm-1.vesta
- \* mode\_684\_760.5\_cm-1.vesta
- \* mode\_685\_766.5\_cm-1.vesta
- \* mode\_686\_767.5\_cm-1.vesta
- \* mode\_687\_772.4\_cm-1.vesta
- \* mode\_688\_772.9\_cm-1.vesta
- \* mode\_689\_776.5\_cm-1.vesta
- \* mode\_68\_182.0\_cm-1.vesta
- \* mode\_690\_777.4\_cm-1.vesta
- \* mode\_691\_777.6\_cm-1.vesta
- \* mode\_692\_781.4\_cm-1.vesta
- \* mode\_693\_782.2\_cm-1.vesta
- \* mode\_694\_785.8\_cm-1.vesta
- \* mode\_695\_786.7\_cm-1.vesta
- \* mode\_696\_786.9\_cm-1.vesta
- \* mode\_697\_787.5\_cm-1.vesta
- \* mode\_698\_790.9\_cm-1.vesta
- \* mode\_699\_791.8\_cm-1.vesta
- \* mode\_69\_183.7\_cm-1.vesta
- \* mode\_6\_65.0\_cm-1.vesta
- \* mode\_700\_792.9\_cm-1.vesta
- \* mode\_701\_795.9\_cm-1.vesta
- \* mode\_702\_800.9\_cm-1.vesta
- \* mode\_703\_802.5\_cm-1.vesta
- \* mode\_704\_803.1\_cm-1.vesta
- \* mode\_705\_803.7\_cm-1.vesta
- \* mode\_706\_803.8\_cm-1.vesta
- \* mode\_707\_805.5\_cm-1.vesta
- \* mode\_708\_805.6\_cm-1.vesta
- \* mode\_709\_806.2\_cm-1.vesta
- \* mode\_70\_184.5\_cm-1.vesta
- \* mode\_710\_807.7\_cm-1.vesta
- \* mode\_711\_808.2\_cm-1.vesta
- \* mode\_712\_810.4\_cm-1.vesta
- \* mode\_713\_810.5\_cm-1.vesta

\* mode\_714\_812.8\_cm-1.vesta  
\* mode\_715\_813.1\_cm-1.vesta  
\* mode\_716\_813.7\_cm-1.vesta  
\* mode\_717\_815.1\_cm-1.vesta  
\* mode\_718\_815.2\_cm-1.vesta  
\* mode\_719\_815.9\_cm-1.vesta  
\* mode\_71\_185.1\_cm-1.vesta  
\* mode\_720\_817.8\_cm-1.vesta  
\* mode\_721\_818.5\_cm-1.vesta  
\* mode\_722\_819.1\_cm-1.vesta  
\* mode\_723\_822.0\_cm-1.vesta  
\* mode\_724\_824.6\_cm-1.vesta  
\* mode\_725\_828.8\_cm-1.vesta  
\* mode\_726\_830.6\_cm-1.vesta  
\* mode\_727\_897.1\_cm-1.vesta  
\* mode\_728\_898.5\_cm-1.vesta  
\* mode\_729\_899.9\_cm-1.vesta  
\* mode\_72\_186.2\_cm-1.vesta  
\* mode\_730\_900.6\_cm-1.vesta  
\* mode\_731\_900.8\_cm-1.vesta  
\* mode\_732\_901.5\_cm-1.vesta  
\* mode\_733\_902.5\_cm-1.vesta  
\* mode\_734\_904.6\_cm-1.vesta  
\* mode\_735\_908.8\_cm-1.vesta  
\* mode\_736\_910.2\_cm-1.vesta  
\* mode\_737\_912.2\_cm-1.vesta  
\* mode\_738\_917.0\_cm-1.vesta  
\* mode\_739\_923.7\_cm-1.vesta  
\* mode\_73\_186.8\_cm-1.vesta  
\* mode\_740\_924.1\_cm-1.vesta  
\* mode\_741\_927.8\_cm-1.vesta  
\* mode\_742\_928.9\_cm-1.vesta  
\* mode\_743\_930.4\_cm-1.vesta  
\* mode\_744\_931.6\_cm-1.vesta  
\* mode\_745\_936.1\_cm-1.vesta  
\* mode\_746\_937.3\_cm-1.vesta  
\* mode\_747\_938.3\_cm-1.vesta  
\* mode\_748\_941.0\_cm-1.vesta  
\* mode\_749\_942.3\_cm-1.vesta  
\* mode\_74\_187.4\_cm-1.vesta  
\* mode\_750\_951.2\_cm-1.vesta  
\* mode\_751\_952.8\_cm-1.vesta  
\* mode\_752\_957.1\_cm-1.vesta  
\* mode\_753\_960.7\_cm-1.vesta  
\* mode\_754\_962.7\_cm-1.vesta  
\* mode\_755\_963.8\_cm-1.vesta  
\* mode\_756\_963.9\_cm-1.vesta



- \* mode\_757\_965.0\_cm-1.vesta
- \* mode\_758\_968.0\_cm-1.vesta
- \* mode\_759\_968.1\_cm-1.vesta
- \* mode\_75\_189.6\_cm-1.vesta
- \* mode\_760\_969.3\_cm-1.vesta
- \* mode\_761\_971.3\_cm-1.vesta
- \* mode\_762\_973.6\_cm-1.vesta
- \* mode\_763\_973.7\_cm-1.vesta
- \* mode\_764\_974.9\_cm-1.vesta
- \* mode\_765\_975.5\_cm-1.vesta
- \* mode\_766\_976.5\_cm-1.vesta
- \* mode\_767\_977.7\_cm-1.vesta
- \* mode\_768\_978.8\_cm-1.vesta
- \* mode\_769\_979.8\_cm-1.vesta
- \* mode\_76\_190.8\_cm-1.vesta
- \* mode\_770\_981.4\_cm-1.vesta
- \* mode\_771\_987.2\_cm-1.vesta
- \* mode\_772\_988.6\_cm-1.vesta
- \* mode\_773\_994.3\_cm-1.vesta
- \* mode\_774\_997.4\_cm-1.vesta
- \* mode\_775\_1002.7\_cm-1.vesta
- \* mode\_776\_1005.1\_cm-1.vesta
- \* mode\_777\_1006.6\_cm-1.vesta
- \* mode\_778\_1009.6\_cm-1.vesta
- \* mode\_779\_1016.4\_cm-1.vesta
- \* mode\_77\_191.6\_cm-1.vesta
- \* mode\_780\_1016.7\_cm-1.vesta
- \* mode\_781\_1019.3\_cm-1.vesta
- \* mode\_782\_1019.8\_cm-1.vesta
- \* mode\_783\_1020.2\_cm-1.vesta
- \* mode\_784\_1021.7\_cm-1.vesta
- \* mode\_785\_1022.2\_cm-1.vesta
- \* mode\_786\_1024.0\_cm-1.vesta
- \* mode\_787\_1024.8\_cm-1.vesta
- \* mode\_788\_1028.8\_cm-1.vesta
- \* mode\_789\_1030.3\_cm-1.vesta
- \* mode\_78\_192.0\_cm-1.vesta
- \* mode\_790\_1034.1\_cm-1.vesta
- \* mode\_791\_1034.7\_cm-1.vesta
- \* mode\_792\_1036.9\_cm-1.vesta
- \* mode\_793\_1037.5\_cm-1.vesta
- \* mode\_794\_1042.3\_cm-1.vesta
- \* mode\_795\_1043.6\_cm-1.vesta
- \* mode\_796\_1043.9\_cm-1.vesta
- \* mode\_797\_1046.6\_cm-1.vesta
- \* mode\_798\_1048.2\_cm-1.vesta
- \* mode\_799\_1050.9\_cm-1.vesta

- \* mode\_79\_192.3\_cm-1.vesta
- \* mode\_7\_68.0\_cm-1.vesta
- \* mode\_800\_1051.9\_cm-1.vesta
- \* mode\_801\_1053.7\_cm-1.vesta
- \* mode\_802\_1055.0\_cm-1.vesta
- \* mode\_803\_1056.2\_cm-1.vesta
- \* mode\_804\_1064.0\_cm-1.vesta
- \* mode\_805\_1068.2\_cm-1.vesta
- \* mode\_806\_1076.5\_cm-1.vesta
- \* mode\_807\_1079.0\_cm-1.vesta
- \* mode\_808\_1086.0\_cm-1.vesta
- \* mode\_809\_1096.8\_cm-1.vesta
- \* mode\_80\_194.2\_cm-1.vesta
- \* mode\_810\_1144.1\_cm-1.vesta
- \* mode\_811\_1164.4\_cm-1.vesta
- \* mode\_812\_3649.2\_cm-1.vesta
- \* mode\_813\_3649.5\_cm-1.vesta
- \* mode\_814\_3665.1\_cm-1.vesta
- \* mode\_815\_3667.3\_cm-1.vesta
- \* mode\_816\_3678.5\_cm-1.vesta
- \* mode\_817\_3680.8\_cm-1.vesta
- \* mode\_818\_3681.6\_cm-1.vesta
- \* mode\_819\_3681.7\_cm-1.vesta
- \* mode\_81\_194.3\_cm-1.vesta
- \* mode\_820\_3681.9\_cm-1.vesta
- \* mode\_821\_3681.9\_cm-1.vesta
- \* mode\_822\_3684.9\_cm-1.vesta
- \* mode\_823\_3685.4\_cm-1.vesta
- \* mode\_824\_3686.5\_cm-1.vesta
- \* mode\_825\_3687.8\_cm-1.vesta
- \* mode\_826\_3688.7\_cm-1.vesta
- \* mode\_827\_3688.7\_cm-1.vesta
- \* mode\_828\_3689.5\_cm-1.vesta
- \* mode\_829\_3691.7\_cm-1.vesta
- \* mode\_82\_195.2\_cm-1.vesta
- \* mode\_830\_3692.8\_cm-1.vesta
- \* mode\_831\_3695.3\_cm-1.vesta
- \* mode\_832\_3696.0\_cm-1.vesta
- \* mode\_833\_3696.7\_cm-1.vesta
- \* mode\_834\_3697.8\_cm-1.vesta
- \* mode\_835\_3699.1\_cm-1.vesta
- \* mode\_836\_3705.1\_cm-1.vesta
- \* mode\_837\_3707.0\_cm-1.vesta
- \* mode\_838\_3712.6\_cm-1.vesta
- \* mode\_839\_3713.4\_cm-1.vesta
- \* mode\_83\_195.6\_cm-1.vesta
- \* mode\_840\_3713.5\_cm-1.vesta

- \* mode\_841\_3717.2\_cm-1.vesta
- \* mode\_842\_3717.9\_cm-1.vesta
- \* mode\_843\_3718.8\_cm-1.vesta
- \* mode\_844\_3724.4\_cm-1.vesta
- \* mode\_845\_3725.1\_cm-1.vesta
- \* mode\_846\_3726.2\_cm-1.vesta
- \* mode\_847\_3726.3\_cm-1.vesta
- \* mode\_848\_3726.3\_cm-1.vesta
- \* mode\_849\_3726.6\_cm-1.vesta
- \* mode\_84\_197.5\_cm-1.vesta
- \* mode\_850\_3728.8\_cm-1.vesta
- \* mode\_851\_3729.4\_cm-1.vesta
- \* mode\_852\_3729.9\_cm-1.vesta
- \* mode\_853\_3735.1\_cm-1.vesta
- \* mode\_854\_3740.2\_cm-1.vesta
- \* mode\_855\_3742.0\_cm-1.vesta
- \* mode\_856\_3747.6\_cm-1.vesta
- \* mode\_857\_3748.0\_cm-1.vesta
- \* mode\_858\_3756.0\_cm-1.vesta
- \* mode\_859\_3763.2\_cm-1.vesta
- \* mode\_85\_198.0\_cm-1.vesta
- \* mode\_860\_3763.5\_cm-1.vesta
- \* mode\_861\_3765.8\_cm-1.vesta
- \* mode\_862\_3766.7\_cm-1.vesta
- \* mode\_863\_3767.9\_cm-1.vesta
- \* mode\_864\_3770.2\_cm-1.vesta
- \* mode\_865\_3770.9\_cm-1.vesta
- \* mode\_866\_3772.5\_cm-1.vesta
- \* mode\_867\_3772.7\_cm-1.vesta
- \* mode\_868\_3773.1\_cm-1.vesta
- \* mode\_869\_3773.6\_cm-1.vesta
- \* mode\_86\_198.4\_cm-1.vesta
- \* mode\_870\_3775.2\_cm-1.vesta
- \* mode\_871\_3775.8\_cm-1.vesta
- \* mode\_872\_3777.7\_cm-1.vesta
- \* mode\_873\_3781.5\_cm-1.vesta
- \* mode\_87\_198.4\_cm-1.vesta
- \* mode\_88\_200.5\_cm-1.vesta
- \* mode\_89\_200.7\_cm-1.vesta
- \* mode\_8\_73.8\_cm-1.vesta
- \* mode\_90\_201.3\_cm-1.vesta
- \* mode\_91\_202.2\_cm-1.vesta
- \* mode\_92\_202.5\_cm-1.vesta
- \* mode\_93\_202.7\_cm-1.vesta
- \* mode\_94\_204.6\_cm-1.vesta
- \* mode\_95\_204.9\_cm-1.vesta
- \* mode\_96\_205.2\_cm-1.vesta

- \* mode\_97\_205.6\_cm-1.vesta
- \* mode\_98\_206.6\_cm-1.vesta
- \* mode\_99\_207.0\_cm-1.vesta
- \* mode\_9\_76.1\_cm-1.vesta

The copyright of individual parts of the supplement might differ from the article licence.
